# Supplementary material for: Annotation of phenotypes using ontologies: a gold standard for the training and evaluation of natural language processing systems
Source: Oxford University Press journal article supplement (doi:10.1093/database/bay110), 2018-01-01
Supplement: bay110_supp.pdf [file bay110_supp.pdf]

1 Annotation of phenotypes using ontologies: a Gold  
2 Standard for the training and evaluation of natural  
3 language processing systems

4 Wasila Dahdul<sup>1\*</sup>, Prashanti Manda<sup>2\*</sup>, Hong Cui<sup>3</sup>, James P. Balhoff<sup>4</sup>, T.  
5 Alexander Dececchi<sup>1,a</sup>, Nizar Ibrahim<sup>5,b</sup>, Hilmar Lapp<sup>6</sup>, Todd Vision<sup>4</sup>, and  
6 Paula M. Mabee<sup>1</sup>

7 <sup>1</sup>University of South Dakota

8 <sup>2</sup>University of North Carolina at Greensboro

9 <sup>3</sup>University of Arizona

10 <sup>4</sup>University of North Carolina at Chapel Hill

11 <sup>5</sup>University of Chicago

12 <sup>6</sup>Duke University

13 <sup>a</sup>Current Affiliation: University of Pittsburgh at Johnstown

14 <sup>b</sup>Current Affiliation: University of Detroit Mercy & University of  
15 Portsmouth

16 <sup>\*</sup>Equal contributions

17 August 23, 2018

18 **Keywords:** ontology; phenotype; annotation; anatomy; vertebrates; natural language  
19 processing

20 **Abstract**

21 Natural language descriptions of organismal phenotypes, a principal object of study in biol-  
22 ogy, are abundant in the biological literature. Expressing these phenotypes as logical state-  
23 ments using ontologies would enable large-scale analysis on phenotypic information from

24 diverse systems. However, considerable human effort is required to make these phenotype  
 25 descriptions amenable to machine reasoning. Natural language processing tools have been  
 26 developed to facilitate this task, and the training and evaluation of these tools depend on the  
 27 availability of high quality, manually annotated Gold Standard datasets. We describe the  
 28 development of an expert-curated Gold Standard dataset of annotated phenotypes for evolu-  
 29 tionary biology. The Gold Standard was developed for the curation of complex comparative  
 30 phenotypes for the Phenoscape project. It was created by consensus among three curators  
 31 and consists of Entity-Quality expressions of varying complexity. We use the Gold Standard  
 32 to evaluate annotations created by human curators and those generated by the Semantic  
 33 CharaParser tool. Using four annotation accuracy metrics that can account for any level of  
 34 relationship between terms from two phenotype annotations, we found that machine-human  
 35 consistency, or similarity, was significantly lower than inter-curator (human-human) consis-  
 36 tency. Surprisingly, allowing curators access to external information did not significantly  
 37 increase the similarity of their annotations to the Gold Standard or have a significant effect  
 38 on inter-curator consistency. We found that the similarity of machine annotations to the  
 39 Gold Standard increased after new relevant ontology terms had been added. Evaluation by  
 40 the original authors of the character descriptions indicated that the Gold Standard anno-  
 41 tations came closer to representing their intended meaning than did either the curator or  
 42 machine annotations. These findings point toward ways to better design software to augment  
 43 human curators, and use of the Gold Standard corpus will allow training and assessment of  
 44 new tools to improve phenotype annotation accuracy at scale.

## 45 Contents

|    |                                                               |          |
|----|---------------------------------------------------------------|----------|
| 46 | <b>1 Introduction</b>                                         | <b>3</b> |
| 47 | <b>2 Related Work</b>                                         | <b>7</b> |
| 48 | <b>3 Methods</b>                                              | <b>8</b> |
| 49 | 3.1 Source of phenotypes . . . . .                            | 8        |
| 50 | 3.2 Experimental design . . . . .                             | 8        |
| 51 | 3.3 The Gold Standard . . . . .                               | 10       |
| 52 | 3.4 Ontologies . . . . .                                      | 10       |
| 53 | 3.5 Measuring similarity between annotation sources . . . . . | 11       |
| 54 | 3.5.1 Generating subsumers for EQ annotations . . . . .       | 12       |
| 55 | 3.5.2 Jaccard Similarity . . . . .                            | 14       |
| 56 | 3.5.3 Information Content . . . . .                           | 14       |

|    |          |                                                                              |           |
|----|----------|------------------------------------------------------------------------------|-----------|
| 57 | 3.5.4    | Partial Precision and Partial Recall . . . . .                               | 15        |
| 58 | 3.6      | Author assessment of Gold Standard, curator, and machine annotations . . .   | 16        |
| 59 | <b>4</b> | <b>Results</b>                                                               | <b>17</b> |
| 60 | 4.1      | Datasets and source code . . . . .                                           | 17        |
| 61 | 4.2      | Gold Standard . . . . .                                                      | 17        |
| 62 | 4.3      | Consistency among human curators . . . . .                                   | 21        |
| 63 | 4.4      | Human–machine consistency . . . . .                                          | 21        |
| 64 | 4.4.1    | Effect of ontology completeness on SCP-human consistency . . . . .           | 22        |
| 65 | 4.5      | Author evaluation . . . . .                                                  | 22        |
| 66 | <b>5</b> | <b>Discussion</b>                                                            | <b>24</b> |
| 67 | 5.1      | Gold Standard . . . . .                                                      | 24        |
| 68 | 5.2      | Inter-curator variation . . . . .                                            | 26        |
| 69 | 5.3      | Human–machine variation . . . . .                                            | 27        |
| 70 | 5.4      | Usefulness of semantic similarity for partial matches . . . . .              | 27        |
| 71 | 5.5      | Effect of external knowledge on inter-curator consistency and accuracy . . . | 27        |
| 72 | 5.6      | Machine performance is improved as ontologies become more complete . . .     | 28        |
| 73 | 5.7      | Future Work . . . . .                                                        | 28        |
| 74 | 5.7.1    | Improving reasoning over EQ annotations . . . . .                            | 28        |
| 75 | 5.7.2    | Improving Semantic CharaParser . . . . .                                     | 29        |

## 1 Introduction

Phenotype descriptions of organisms are documented across nearly all areas of biological research including biomedicine, evolution, developmental biology, and paleobiology. The vast majority of such descriptions are expressed in the scientific literature using natural language. While allowing for rich semantics, natural language descriptions can be difficult for non-experts to understand, and are opaque to machine reasoning, and thus hinder the integration of phenotypic information across different studies, taxonomic systems, and branches of biology (1).

To make phenotype descriptions more amenable to computation, model organism databases employ human curators to convert natural language phenotype descriptions into machine-readable phenotype annotations that use standard ontologies (e.g., 2, 3, 4, 5). One format used for phenotype annotations is the ontology-based Entity–Quality (EQ) representation, in which an entity represents a biological object such as an anatomical structure, space, behavior, or a biological process; a quality represents a trait or property that an entity possesses,

90 e.g., shape, color, or size; and an optional related entity allows for binary relations such as  
91 adjacency (6, 7). Among formal representations of phenotype descriptions, EQ is the most  
92 widely used, e.g., (8), although other formal representations have been proposed (9). Further,  
93 to create entities and qualities that adequately represent the often highly detailed pheno-  
94 type descriptions, curators create complex logical expressions called ‘post-compositions’ by  
95 combining ontology terms, relations, and spatial properties in different ways. In contrast  
96 to EQ expressions with single-term entities and qualities, creating post-composed entities  
97 and qualities (Table 1) can be a complex task, due to the flexibility in logic expression  
98 and the different semantic interpretations that free-text descriptions often allow. Addition-  
99 ally, the varied ways in which concepts from multiple ontologies can be combined to create  
100 post-composed expressions result in a vast set of possible EQ combinations where consis-  
101 tency is difficult to achieve. As a result, it can be expected that EQ annotations involving  
102 post-compositions will show variability between different curators.

103 To best resolve the ambiguities inherent in natural language descriptions, human cura-  
104 tors will often not only use their domain expertise, but also refer to external information  
105 for deducing the original author’s intent. Phenotype descriptions found in the literature,  
106 however, are typically in a concise format with little or no contextualizing information that  
107 would help with disambiguating the intended meaning. The difficulty of disambiguation can  
108 be exacerbated when the requisite entity and quality domain ontologies do not yet include  
109 an obviously appropriate term for a particular annotation (10). As a consequence of this and  
110 other challenges, manual curation tends to be extremely labor-intensive, and few projects  
111 have the resources to comprehensively curate the relevant literature. To help address this  
112 bottleneck, text mining and natural language processing (NLP) systems have been devel-  
113 oped with the goal of supplementing or augmenting the work of human curators. Facilitating  
114 continuous improvement of these systems, tools, and algorithms requires means to compare  
115 different systems objectively and fairly with each other and with human curators, in partic-  
116 ular with respect to accuracy of generated annotations. This raises several questions. One,  
117 what is the reference against which accuracy is best assessed if annotations generated for  
118 a given task show variability between different human curators? Two, how consistent is  
119 the result of machine annotation with that of a human curator? Three, to what extent is  
120 machine annotation performance limited by inherent differences between how a machine and  
121 a human expert execute a curation task? In particular, in contrast to human curators who  
122 will consult external information, a software tool will normally only use the vocabulary and  
123 domain knowledge it is initially provided with in the form of input lexicons and ontologies.

124 The variability among expert curators can be used to provide a baseline for the perfor-  
125 mance evaluation of automated systems. Cui et al. (11) conducted an inter-curator consis-

Table 1: Examples of Entity–Quality (EQ) annotations of varying complexity from the present study. **A** illustrates a simple EQ annotation; **B** shows an EQ annotation in which the quality term relates two entities to each other; and **C** provides an example of an entity that does not correspond to a term in an existing ontology, but is instead a complex logical expression post-composed from multiple ontology terms.

| Character:<br>state                              | Entity                                                                                                                                                                                                    | Quality                      | Related entity                 |
|--------------------------------------------------|-----------------------------------------------------------------------------------------------------------------------------------------------------------------------------------------------------------|------------------------------|--------------------------------|
| <b>A:</b> sclerotic ossicles: greatly enlarged   | UBERON: <i>scleral ossicle</i>                                                                                                                                                                            | PATO: <i>increased size</i>  |                                |
| <b>B:</b> nasal-prefrontal contact: present      | UBERON: <i>nasal bone</i>                                                                                                                                                                                 | PATO: <i>in contact with</i> | UBERON: <i>prefrontal bone</i> |
| <b>C:</b> lateral pelvic glands: absent in males | UBERON: <i>gland</i> and<br>( <i>part_of</i> some<br>(BSPO: <i>lateral region</i> and<br>( <i>part_of</i> some<br>UBERON: <i>pelvis</i> and<br>( <i>part_of</i> some<br>UBERON: <i>male organism</i> )))) | PATO: <i>absent</i>          |                                |

126 tency experiment to evaluate Semantic CharaParser (SCP), a natural language processing  
127 tool designed for generating EQ annotations from character descriptions in the compara-  
128 tive anatomy literature (specifically, from phylogenetic character matrices (12)). Characters  
129 consist of two or more character states contrasting the variation in phenotype among a set  
130 of taxa. Character-by-taxon matrices are used in phylogenetic and comparative analyses to  
131 infer the evolutionary relationships among the taxa under study, and to reconstruct putative  
132 character state evolution on the phylogeny.

133 To our knowledge, SCP is the first semi-automatic software designed to generate EQ  
134 annotations. SCP works by parsing the original character descriptions to identify entity and  
135 quality terms, matching these terms to ontology concepts, and generating logical relations  
136 and, where appropriate, post-compositions from the matched concepts based on a set of rules.  
137 In the experiment, three curators independently annotated a set of 203 characters, randomly  
138 chosen from seven publications representing extant and extinct vertebrates for a variety of  
139 anatomical systems with an emphasis on skeletal anatomy, corresponding to the curators’  
140 domain of expertise (Table 2). In the first, or “Naïve”, round of annotation, curators were  
141 not allowed access to sources of knowledge external to the character description, including  
142 the publication from which the matrix originated. In the second, or “Knowledge” round,  
143 curators were allowed to access external sources of knowledge, such as the full publication  
144 from which the character was drawn, related literature and other online sources. The curators  
145 were given a set of initial ontologies to use for curation. The new ontology terms created  
146 during curation were added to the “Initial” ontologies to create curator-specific “Augmented”  
147 ontologies. At the end of the curation rounds, all curator-specific augmented ontologies were  
148 merged to create a final “Merged” ontology.

149 The Cui et al. (11) study was designed such that SCP was used to annotate the same  
150 set of characters as human curators using three sets of ontologies (Initial, Augmented, and  
151 Merged) with progressively more comprehensive coverage, as described below. The primary  
152 findings were as follows. The performance of SCP was significantly lower as compared to  
153 human curators. When comparing the performance of SCP to human curators, no statisti-  
154 cally significant differences were found between Naïve and Knowledge rounds. Inter-curator  
155 Recall and Precision were also not found to be significantly different between the Naïve and  
156 Knowledge rounds. SCP performed significantly better with Augmented versus Initial on-  
157 tologies. However, there was no significant difference in performance between Augmented  
158 and Merged ontologies.

159 While useful, there were several limitations in the Cui et al. (11) evaluation of SCP,  
160 including the lack of a Gold Standard against which to measure its performance. Manually  
161 annotated Gold Standard datasets are high quality benchmarks for both evaluation and

162 training of automated NLP systems e.g., (13, 14, 15). Another limitation was the use of  
163 performance measures that did not fully account for the continuum of similarity possible  
164 between semantic phenotype annotations. While these authors recognized that phenotypes  
165 annotated with parent and daughter terms in the ontology bear some partial resemblance,  
166 here we introduce semantic similarity measures that can account for any level of relationship  
167 between the terms from two phenotype annotations.

168 The present work describes the development of an expert-curated Gold Standard dataset  
169 of annotated phenotypes for evolutionary biology that is the best available given current  
170 constraints in semantic representation. The Gold Standard was developed for the annota-  
171 tion of the complex evolutionary phenotypes described in the systematics literature for the  
172 Phenoscope project (12, 16). Unlike many published gold standards for ontology annota-  
173 tion, which frequently focus on entity recognition, e.g., (17), the Phenoscope Gold Standard  
174 consists of EQ expressions of varying complexity. We evaluate how well the annotations of  
175 individual curators and the machine (SCP) compare to those of the Gold Standard, using  
176 four ontology-aware metrics. Two of these are traditional measures of semantic similarity  
177 (18) and two are extensions of Precision and Recall that account for partial semantic sim-  
178 ilarity. In addition, we directly assessed the quality of the Gold Standard with an author  
179 survey, in which the original domain experts were invited to rank the accuracy of a subset  
180 of the annotations from the Gold Standard, the individual human curators, and SCP.

## 181 2 Related Work

182 Gold standard corpora are collections of articles manually annotated by expert curators,  
183 and they provide a high quality comparison against which to test automated text processing  
184 systems. Funk et al. (15), for example, used the CRAFT annotation corpus (17, 19) for the  
185 evaluation of three concept annotation systems. Within the biomedical sciences, a number  
186 of Gold Standard corpora have been developed (20, 21, 22), and these focus on concept  
187 recognition. Concepts are annotated at the text string level, e.g., (17) or in some cases,  
188 annotations are attached at the whole document level, e.g., (21). Because of the effort and  
189 costs required for manual annotation, “silver standard” corpora have also been created, in  
190 which automatically generated annotations are grouped into a single corpus (23, 24). As  
191 far as we are aware, there are no published Gold Standard corpora for EQ phenotypes, and  
192 none for evolutionary phenotypes.

193 Inter-curator consistency has been used by several studies as a baseline against which  
194 to evaluate the performance of automated curation software (25, 26, 27). Weigers et al.  
195 measured the performance of text mining software that identifies chemical–gene interactions

196 from the literature by comparing the output against inter-curator consistency on the same  
197 task (25). Sohngen et al. evaluated the performance of the DRENDA text-mining system,  
198 which retrieves enzyme-related information on diseases (26). Most similar to the work re-  
199 ported here is the study by Camon et al. (27) in which inter-curator consistency was used as  
200 a baseline to evaluate performance of text mining systems to retrieve Gene Ontology terms  
201 from literature. In their experiment, three curators co-curated 30 papers and extracted GO  
202 terms from the text. In inter-curator comparisons, GO term pairs were classified into three  
203 categories: exact matches, same lineage (terms related via subsumption relationships), and  
204 different lineage (unrelated terms). They found that curators chose exactly the same terms  
205 39%, related terms 43%, and unrelated terms 19% of the time. Our approach differs in that  
206 we evaluate inter-curator consistency at the task of phenotype (EQ) annotation, and we em-  
207 ploy metrics that can account for partial matches between annotations by taking advantage  
208 of both ontology structure and the information content from annotation frequencies.

## 209 3 Methods

### 210 3.1 Source of phenotypes

211 Twenty-nine characters were randomly selected from each of seven published phylogenetic  
212 studies, yielding 203 characters and 463 character states in total (Table 2). The studies were  
213 chosen to (i) have a wide taxonomic breadth across vertebrates, (ii) include both extinct  
214 and extant taxa, and (iii) include characters from several anatomical systems (e.g., skeletal,  
215 muscular, nervous systems). These objectives were intended to reduce potential sources  
216 of systematic bias. For example, the prevailing style of character descriptions can differ  
217 depending on the taxonomic group of interest. Further, the curators had varying expertise  
218 across the vertebrate taxa. The characters and character states presented to curators were  
219 extracted directly from the character list in each publication (e.g., “Pelvic plate semicircular  
220 with anterolateral concavity. Absent (0); present (1)” from character 39 in Coates and  
221 Sequeira (28)). Thus curators had access to the full character and state descriptions for  
222 each of the selected characters, in addition to taxonomic scope and publication source, but  
223 they—and the SCP developers—were blind to the choice of papers and the selection of  
224 characters prior to the experiment.

### 225 3.2 Experimental design

226 The common set of character states was annotated independently by three curators (W. Dah-  
227 dul, T. A. Dececchi and N. Ibrahim) and by Semantic CharaParser (SCP). The curators were



Table 2: Phylogenetic studies from which characters were selected.

| Reference                | Taxonomic group      | No. taxa | No. characters |
|--------------------------|----------------------|----------|----------------|
| Hill (29)                | Amniotes             | 80       | 365            |
| Skutschas and Gubin (30) | Amphibians           | 22       | 69             |
| Nesbitt et al. (31)      | Birds                | 22       | 107            |
| Coates and Sequeira (28) | Cartilaginous fishes | 23       | 86             |
| Chakrabarty (32)         | Cichlid fishes       | 41       | 89             |
| O’Leary et al. (33)      | Mammals              | 84       | 4,541          |
| Conrad (34)              | Squamate reptiles    | 223      | 363            |

228 randomly assigned identifiers C1, C2, and C3 at the beginning of the study. Curators used  
 229 Phenex software (10, 35) for manually generating annotations. The annotations are complex  
 230 expressions made up of entity (E), quality (Q) and where required, a related entity (RE). The  
 231 E and RE components employ Uberon (36, 37) concepts and may be post-composed with  
 232 terms from multiple ontologies including Uberon, PATO (38, 39), and the Spatial Ontology  
 233 (BSPO) (40) while the Q component uses PATO concepts. Curators were free to create one  
 234 or multiple EQ annotations per state, and they were encouraged to annotate at a fine level  
 235 of detail (41). To measure the effect of external knowledge on inter-curator consistency, two  
 236 rounds of human curation were performed. In the first (“Naïve”) round, the character and  
 237 character state text were the only information the curators were allowed to consult. Access-  
 238 ing the source publication or any external information was not permitted. This was intended  
 239 to simulate the extent of information available to SCP, although curators naturally use their  
 240 subject domain expertise when composing annotations. In the second (“Knowledge”) round,  
 241 the curators annotated the same set of characters as in the Naïve round, but they were free  
 242 to consult the full text of the source publication and to access any other external informa-  
 243 tion. In total, this resulted in six sets of human-curated EQ annotations, and six augmented  
 244 ontologies produced by the curators independently during the Naïve and Knowledge rounds.

245 Several steps were taken to promote consistency among the human curators, and between  
 246 curators and SCP. First, curators developed and were trained on a set of curation guidelines  
 247 for the annotation of phylogenetic characters (the Phenescape Guide to Character Annota-  
 248 tion (42)). These guidelines were also made available to SCP developers, and are the basis of  
 249 rules according to which SCP generates EQ expressions. Second, curators took advantage of  
 250 an interactive Consistency Review panel available in Phenex, which reports missing or prob-  
 251 lematic annotations, such as a relational quality used to annotate a character state without  
 252 also specifying a related entity. Further, each curator had at least one year of experience  
 253 with EQ annotation prior to the experiment. Note that each curator still performed their  
 254 curation tasks in the experiment independently from each other, and thus there was still

255 room for variation. For instance, for a given character state, one curator might choose to use  
256 an imperfectly matching entity term, while another might aim for a more precise represen-  
257 tation by post-composing a new term from existing terms, and yet another might choose to  
258 add a new single term to their Initial ontology. To avoid advantaging SCP beyond an initial  
259 training dataset, SCP developers were not allowed to observe the human curation process  
260 during the experiment.

### 261 3.3 The Gold Standard

262 The Gold Standard corpus, which consists of a unique set of EQ annotations for each char-  
263 acter state in the 203 character dataset, was created as a consensus dataset by the three  
264 curators. After completing the Knowledge round, the curators reviewed and discussed all  
265 the EQs in their three separate Knowledge round curator datasets for the purpose of devel-  
266 oping a single Gold Standard dataset. In assembling this set of EQ annotations for the Gold  
267 Standard, the curators were not limited to choosing among the individual EQs that they  
268 had created during the experiment; instead, they were free to modify existing annotations  
269 or create entirely new ones. In cases where there was insufficient information to resolve am-  
270 biguities, the curators consulted additional published literature and other online resources.  
271 In some cases, they also contacted domain experts to clarify terminology or anatomy. Once  
272 all three curators were in agreement, they used the Phenex curation software to create the  
273 Gold Standard EQ annotations for the final Gold Standard dataset.

274 In the course of developing the Gold Standard, the curators updated the best practices  
275 for EQ annotation of characters documented in the Phenoscape Guide to Character An-  
276 notation (42). We updated the list of commonly encountered character categories (e.g.,  
277 presence/absence, position, size) with new categories, examples, and EQ conventions. Each  
278 phenotype in the Gold Standard references one or more of the character categories from the  
279 guide.

### 280 3.4 Ontologies

281 The human curators and SCP were provided with the same initial set of ontologies: the  
282 Uberon anatomy ontology (version phenoscape-ext/2013-03-15, (36, 37)), the Spatial On-  
283 tology (BSPO) (release 2013-05-17, (40)), and the Phenotype and Trait Ontology (PATO)  
284 (release 2013-06-03, (39)).

285 In both the Naïve and Knowledge rounds, each curator was free to provisionally add  
286 terms that they deemed missing from any of the Initial ontologies, resulting in Augmented  
287 ontologies that differed from their Initial versions. New term requests were added as pro-

288 visional terms by using the Ontology Request Broker in Phenex (10), which provides an  
 289 interface to the BioPortal’s provisional term API (43). Ontology curators can subsequently  
 290 resolve these requests as mistakenly overlooked existing terms, new synonyms to existing  
 291 terms, or *bona fide* new terms. At the end of the experiment, there were six sets of Aug-  
 292 mented ontologies, one from each curator in each round (Table 3). These were subsequently  
 293 combined to produce a Merged set of ontologies for which redundant classes were manually  
 294 reconciled. To test the effect of ontology coverage on automated EQ annotation, SCP was  
 295 run with the Initial ontology, the Augmented ontologies, and the final Merged ontology. The  
 296 results in each case were compared to those obtained by the human curators, as reported in  
 297 Cui et al. (11).

Table 3: Augmentation of entity (UBERON), quality (PATO), and spatial (BSPO) ontologies by the three curators in both rounds of curation (Naïve and Knowledge). The final Merged ontology includes the reconciled set of terms from all six Augmented ontologies.

| Curation round | Human curator | Terms added to: |      |      |
|----------------|---------------|-----------------|------|------|
|                |               | UBERON          | PATO | BSPO |
| Naïve          | C1            | 109             | 70   | 3    |
|                | C2            | 49              | 32   | 0    |
|                | C3            | 89              | 23   | 2    |
| Knowledge      | C1            | 129             | 74   | 3    |
|                | C2            | 72              | 52   | 0    |
|                | C3            | 108             | 35   | 3    |
| Merged         |               | 199             | 127  | 7    |

### 298 3.5 Measuring similarity between annotation sources

299 When different ontology terms are chosen to annotate a given character state, the selected  
 300 terms may nonetheless be semantically similar. Thus, it is desirable to use measures of  
 301 annotation similarity that allow for varying degrees of relatedness using the background  
 302 ontology and annotation corpus (18). Here, we use four measures, two of which are semantic  
 303 similarity metrics with a history of usage in the literature, and two of which are modifications  
 304 of the traditional measures of Precision and Recall that account for different but semantically  
 305 similar annotations. All four measures can be applied to both full EQ annotations and to  
 306 comparisons among entity terms alone.

307 Semantic similarity measures between annotation sources (e.g., different curators) were  
 308 aggregated at the level of the individual character state, and across all character states  
 309 (Figure 1). Aggregation of pairwise (EQ to EQ) annotations by character state is necessary  
 310 because a curator may generate more than one EQ annotation for a given character state.

311 This is illustrated by Figure 1 where Curator A generated three EQs and Curator B generated  
312 two EQs for State  $i$ . To measure the overall similarity between two annotation sources (e.g.,  
313 Curator A to Curator B in Figure 1, top), we first compute a similarity score between  
314 corresponding character state pairs as the best match (maximum score) among all pairwise  
315 comparisons between EQs for the same character state (Maximum Character State Similarity  
316 in Figure 1). We then compute the similarity between two annotation sources by taking the  
317 arithmetic mean of the pairwise character state similarity scores across all character state  
318 pairs (Mean Curator Similarity in Figure 1, bottom).

### 319 3.5.1 Generating subsumers for EQ annotations

320 We treat each EQ annotation as a node in an *ad hoc* EQ ontology. Creating the complete  
321 cross-product of the component ontologies would necessarily include all possible subsumers  
322 but would be prohibitive. As a memory saving measure, we developed a computationally  
323 efficient approach to identify subsumers for EQ annotations on an *ad hoc* basis, as follows.

324 A comprehensive ontology was created by taking the union of Uberon, PATO and BSPO  
325 ontologies using the `-merge-support-ontologies` command in the owltools software ([https://](https://github.com/owlcollab/owltools)  
326 [github.com/owlcollab/owltools](https://github.com/owlcollab/owltools)). In order to enable reasoning on additional dimensions  
327 (e.g., *part of*) in post-compositions while identifying subsumers, we added additional classes  
328 to the comprehensive ontology. For every concept  $U$  in the Uberon ontology and every object  
329 property  $OP$  used in post-compositions, a class of the form “ $OP$  some  $U$ ” was added to the  
330 comprehensive ontology.

331 First, every EQ annotation is split into individual E, Q, and optionally, RE components  
332 (Figure 2, Step 1). Simultaneously, the EQ annotation is transformed into an OWL class  
333 expression of the form “Q and inheres in some E and towards some RE” (Figure 2, Step  
334 1). Next, superclasses of these individual components and the class expression are retrieved  
335 using the ELK reasoner on the comprehensive ontology (Figure 2, Step 2). Individual E, Q,  
336 RE superclasses are combined to create superclasses of the form E-Q-RE. The combined class  
337 expression and combinatorial E-Q-RE superclasses form the subsumers of an EQ annotation  
338 (Figure 2, Step 3). While it is possible that additional subsumers could be found in the case  
339 that a class in another part of the hierarchy has a logical definition that matches an EQ  
340 expression, it is unlikely for these ontologies because subsuming quality terms in the PATO  
341 ontology do not have logical definitions which make use of Uberon entities.

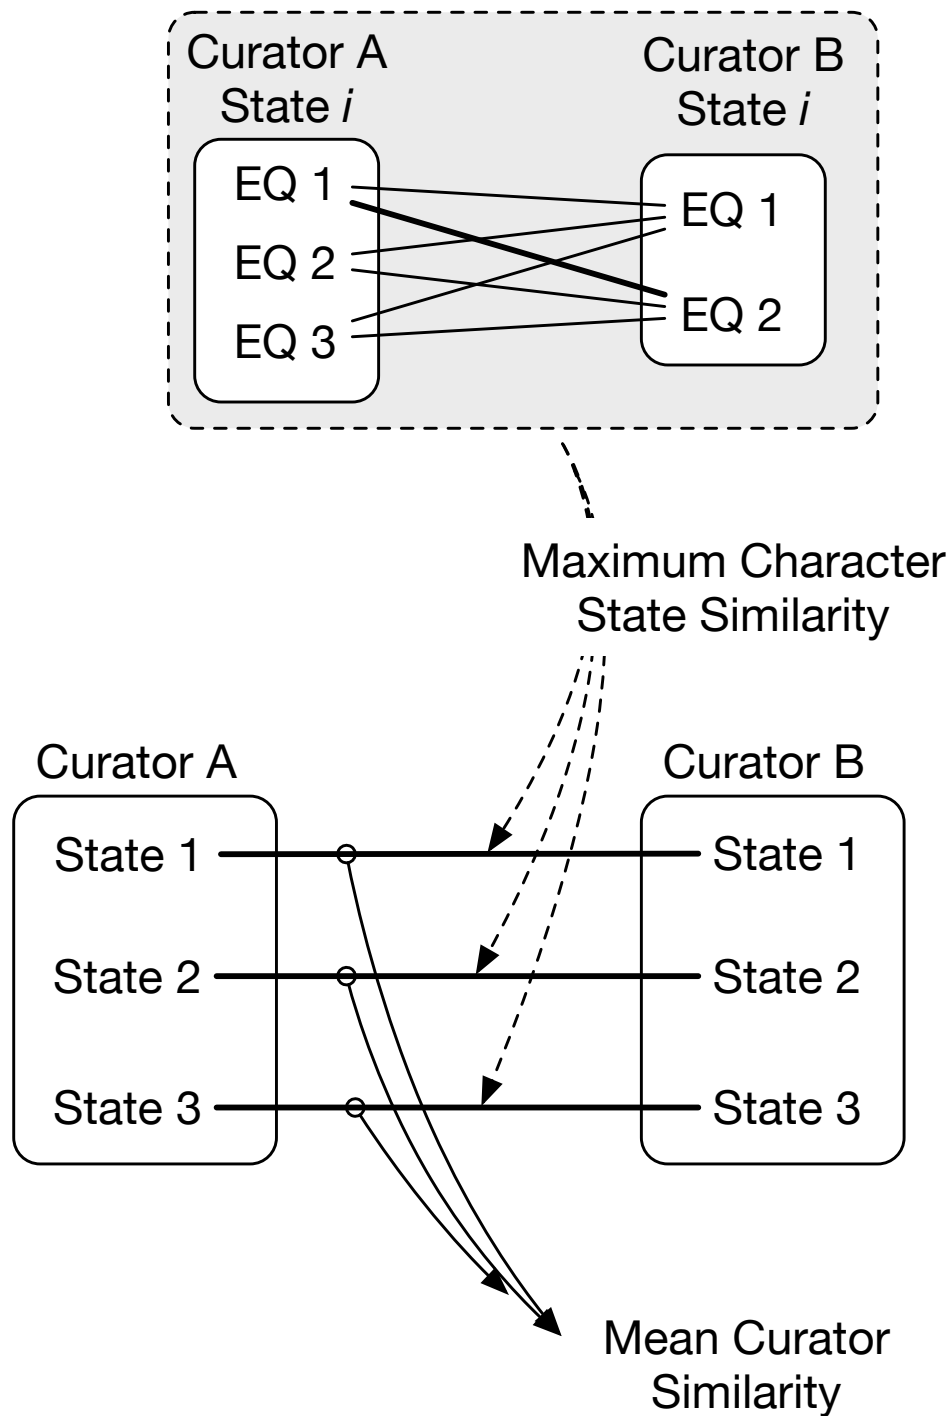

Figure 1: Similarity of annotations between two curators is calculated across multiple character states (e.g., states 1-3, bottom). First, the maximum character state similarity is calculated at the level of a single character state, and is the best match (maximum score) in pairwise comparisons across that state's EQ annotations. Mean curator similarity is then calculated as the mean of the maximum similarities across all character state pairs.

### 3.5.2 Jaccard Similarity

The Jaccard Similarity ( $J_{\text{sim}}$ ) between nodes  $N_1$  and  $N_2$  in an ontology graph is defined as the ratio of the number of nodes in the intersection of their subsumers over the number of nodes in the union of their subsumers (44):

$$J_{\text{sim}}(N_1, N_2) = \frac{|S(N_1) \cap S(N_2)|}{|S(N_1) \cup S(N_2)|}$$

where  $S(N_i)$  is the set of nodes that subsume  $N_i$ .  $J_{\text{sim}}$  measures the distance between two EQs based on the class structure of the ontology. The range of  $J_{\text{sim}} = [0, 1]$ .  $J_{\text{sim}} = 1$  when the two EQs being compared are the same and  $J_{\text{sim}} = 0$  when they have no common subsumers.

### 3.5.3 Information Content

$J_{\text{sim}}$  measures the ontology graph distance between two nodes, and thus necessarily ignores differences in semantic specificity between parent and child terms in different areas of the ontology graph. Information Content ( $IC$ ) is used to capture the specificity of the annotations. The Information Content  $I$  of a node  $N_j$  in an ontology is defined as the proportion of annotations to  $N_j$  and all nodes subsumed by  $N_j$  in an annotation corpus (45). Let  $q$  be the number of nodes in the ontology. Define  $f(N)$  to be the number of annotations directly to  $N_j$  and  $S(N_j)$  to be the set of nodes subsumed by  $N_j$ :

$$I(N_j) = -\log(p(N_j))$$

where

$$p(N_j) = \frac{\sum_{M \in S(N_j)} f(M)}{\sum_{i=1}^q f(N_i)}$$

The  $I$  of two nodes is defined as the  $I$  of the Least Common Subsumer (LCS) of the two nodes. If there are multiple LCSs, the node with the highest  $I$  is used (44).  $I$  has a minimum of zero at the root and a maximum that is dependent on the size of the corpus

$$I_{\text{max}} = -\log\left(\frac{1}{\sum_{i=1}^q f(N_i)}\right)$$

To obtain a normalized score  $I_n$  in the range of  $[0, 1]$ , we use  $I_n = I/I_{\text{max}}$ . In our analysis, the corpus for measurement of  $I_n$  includes all human annotations from both annotation rounds and the annotations from SCP.

### 365 3.5.4 Partial Precision and Partial Recall

366 Precision and Recall are commonly used to evaluate the performance of information re-  
 367 trieval systems. Traditionally, these two measures do not attempt to account for imperfect  
 368 matches; information is either retrieved or it is not. For ontology-based annotations, partial  
 369 information retrieval is possible because the information to be retrieved is the semantics of  
 370 the annotated text, rather than a particular term. To account for this, here we use two  
 371 metrics, Partial Precision ( $PP$ ) and Partial Recall ( $PR$ ), to measure the success of semantic  
 372 information retrieval by a test curator ( $C_T$ ) relative to a reference curator ( $C_R$ ), where a  
 373 curator can be understood as either human or software. While other variants of semantic  
 374 precision and recall are used in the literature (46, 47), the measures we use here specifically  
 375 use semantic similarity, in this case  $J_{\text{sim}}$ , to quantify partial matches between annotations. In  
 376 contrast to our approach, (46) and (47) compute semantic precision and recall by examining  
 377 the superclass sets of two annotations. Depending on the overlap among these sets, each  
 378 superclass is classified as a true positive, false positive, or false negative. These counts are  
 379 then used to compute semantic precision and recall.

380  $PP$  measures the proportion of the semantics annotated by  $C_R$  that are retrieved by  $C_T$   
 381 relative to the number of  $C_T$  annotations.  $PR$ , on the other hand, measures the proportion  
 382 of semantics that are retrieved by  $C_T$  relative to the number of  $C_R$  annotations. Thus, both  
 383  $PP$  and  $PR$  have a range of  $[0,1]$ .  $PP$  will decrease due to extra annotations by  $C_T$  that  
 384 are dissimilar from those in  $C_R$ , while  $PR$  will decrease due to extra annotations in  $C_R$  that  
 385 are lacking from  $C_T$ . Both use  $J_{\text{sim}}$  to measure semantic similarity and are computed at  
 386 the character-state level rather than the individual EQ annotation level. Using  $C_R$  and  $C_T$   
 387 as an example, they are calculated as:

$$PP = \frac{1}{Y} \sum_{j=1}^Y \max_{i=1}^X J_{\text{sim}}(EQ_{C_R,i}, EQ_{C_T,j}) \quad (1)$$

$$PR = \frac{1}{X} \sum_{i=1}^X \max_{j=1}^Y J_{\text{sim}}(EQ_{C_R,i}, EQ_{C_T,j}) \quad (2)$$

388 where  $i = 1..X$  indexes the EQs from  $C_R$  and  $j = 1..Y$  indexes the EQs from  $C_T$ .

### 3.6 Author assessment of Gold Standard, curator, and machine annotations

To assess how close EQ annotations created by the different sources came to the intent of the authors of the seven studies from which the characters were drawn, an author from each was invited to evaluate the relative performance of the annotation sources. Using SurveyMonkey ([www.surveymonkey.com](http://www.surveymonkey.com)), we presented one author from each study with ten randomly selected character states derived from their publication and asked them to rank the five different annotation sources (C1, C2, C3, SCP, GS) for each state [Section 1, Supplementary Materials].

Authors were given background material at the beginning of the survey describing the EQ method of character annotation. Authors were then asked to rank annotations in order of preference, with the annotation that best represented the meaning of the character state ranked first. Annotations were presented in random order, and the source of each annotation could not be tracked by the author. All of the EQ annotations for each character state generated by a particular annotation source were presented to the authors.

We used two statistics to test for differences among author preferences for the different annotation sources (48). Anderson’s statistic,  $A$ , was used to test whether the overall distribution of ranks was different in the observed ( $O$ ) data than expected ( $X$ ):

$$A = \frac{t-1}{t} \sum_{i,j} \frac{(O(i,j) - X(i,j))^2}{X(i,j)}$$

where  $t = 5$  is the number of possible ranks and the expected number of observations  $X(i, j) = n/t$  for factor  $i$  assigned rank  $j$  and number of observations  $n$ .  $A$  was tested against a  $\chi^2$  distribution for significance with  $(t-1)^2$  degrees of freedom. The null hypothesis is that all author preferences for all annotation sources will be equally frequent.

Friedman’s statistic,  $F$ , was used to test if the mean ranks of the different annotation sources differed from chance:

$$R_i = \sum_{j=1}^t j \cdot O(i, j)$$

$$F = \frac{12}{nt(t+1)} \sum_i \left( R_i - \frac{n(t+1)}{2} \right)^2$$

where  $t = 5$  is the number of annotation sources,  $i = 1..t$  is the annotation source,  $j = 1..t$  is the number of ranks that can be assigned to an annotation,  $obs(i, j)$  is the number of times rank  $j$  was assigned to factor  $i$ , and  $n$  is the number of observations, as before.  $F$  was tested



417 against a  $\chi^2$  distribution for significance with  $t - 1 = 4$  degrees of freedom.

## 418 4 Results

### 419 4.1 Datasets and source code

420 The Gold Standard corpus is available in NeXML (49) (`Gold_Standard-final.xml`) and  
421 spreadsheet formats (Excel: `GS-categories.xls`; tab-delimited: `GS-categories.tsv`). The  
422 files include the full-text character and character state descriptions, the source study, and the  
423 associated EQ phenotypes. The spreadsheet format also contains references for each pheno-  
424 type to the character categories from the Phenoscope Guide to Character Annotation (42).  
425 The corpus in the different formats, as well as the ontologies and annotations generated in its  
426 production, have been archived at Zenodo (<https://doi.org/10.5281/zenodo.1345307>).  
427 The source code for the analysis of inter-curator and SCP consistency based on semantic  
428 similarity metrics, as well as the data and ontologies used as input, have been archived  
429 separately, also at Zenodo (<https://doi.org/10.5281/zenodo.1218010>). The source code  
430 used to randomly select characters for the Gold Standard (50) is available as part of the  
431 Phenex software code repository, which has been previously archived at Zenodo (<https://doi.org/10.5281/zenodo.838793>).

432  
433 Semantic CharaParser is available in source code from GitHub (<https://github.com/phenoscope/phenoscope-nlp/>)  
434 under the MIT license. The version used for this pa-  
435 per is the 0.1.0-goldstandard release ([https://github.com/phenoscope/phenoscope-nlp/](https://github.com/phenoscope/phenoscope-nlp/releases/tag/v0.1.0-goldstandard)  
436 [releases/tag/v0.1.0-goldstandard](https://github.com/phenoscope/phenoscope-nlp/releases/tag/v0.1.0-goldstandard)), which is also archived at Zenodo ([https://doi.](https://doi.org/10.5281/zenodo.1246698)  
437 [org/10.5281/zenodo.1246698](https://doi.org/10.5281/zenodo.1246698)).

### 438 4.2 Gold Standard

439 The Gold Standard dataset consists of 617 EQ phenotypes annotated for 203 characters and  
440 463 character states. In total, these phenotypes are composed of 1,096 anatomical terms  
441 (312 unique concepts) from Uberon, 698 quality terms (147 unique) from PATO, and 148  
442 spatial terms (30 unique) from BSPO. The dataset contains 339 post-composed terms (277  
443 anatomical and 62 quality terms) created by relating existing terms from the same or different  
444 ontologies.

445 New anatomy and quality terms were required for the completion of the Gold Standard  
446 annotations. From the full set of terms individually created by the curators during the  
447 experiment (Table 3), a total of 111 anatomical terms and 12 synonyms, and 20 quality terms  
448 and two synonyms, were added to the public versions of Uberon and PATO, respectively.

449 The remaining subset of terms created by curators in the Merged ontology were not added to  
 450 the public ontology versions either because a different term was chosen for the GS annotation  
 451 of a particular character, or the term was determined to be invalid after discussion among  
 452 curators.

453 Using  $J_{\text{sim}}$  and  $I_n$  (see Section 3.5) to measure semantic similarity between the four  
 454 individual annotation sources (C1, C2, C3, SCP) and the Gold Standard, we examined (i)  
 455 whether the human annotations (C1, C2, C3) showed an increase in similarity to the Gold  
 456 Standard between the Naïve and Knowledge rounds and (ii) whether the machine annotations  
 457 (SCP) showed an increase in similarity to the Gold Standard as ontologies progressed from  
 458 the Initial, to Augmented, and to the final Merged version.

459 Figure 3 shows similarity (as measured by  $PP$ ,  $PR$ ,  $J_{\text{sim}}$ , and  $I_n$ ) between annotations  
 460 derived from the curators and the Gold Standard in Naïve and Knowledge curation rounds.  
 461 Based on two sided, paired Wilcoxon signed rank tests,  $PR$  and  $J_{\text{sim}}$  significantly differed  
 462 for C1 ( $PR$ :  $p = 1.10 \times 10^{-12}$ ,  $J_{\text{sim}}$ :  $p = 2.06 \times 10^{-10}$ ) and C2 ( $PR$ :  $p = 8.49 \times 10^{-5}$ ,  
 463  $J_{\text{sim}}$ :  $p = 0.0002$ ),  $PP$  significantly differed for C1 ( $p = 1.24 \times 10^{-10}$ ), while  $I_n$  significantly  
 464 differed for C1 ( $p = 2.15 \times 10^{-11}$ ) between the Naïve and Knowledge rounds.

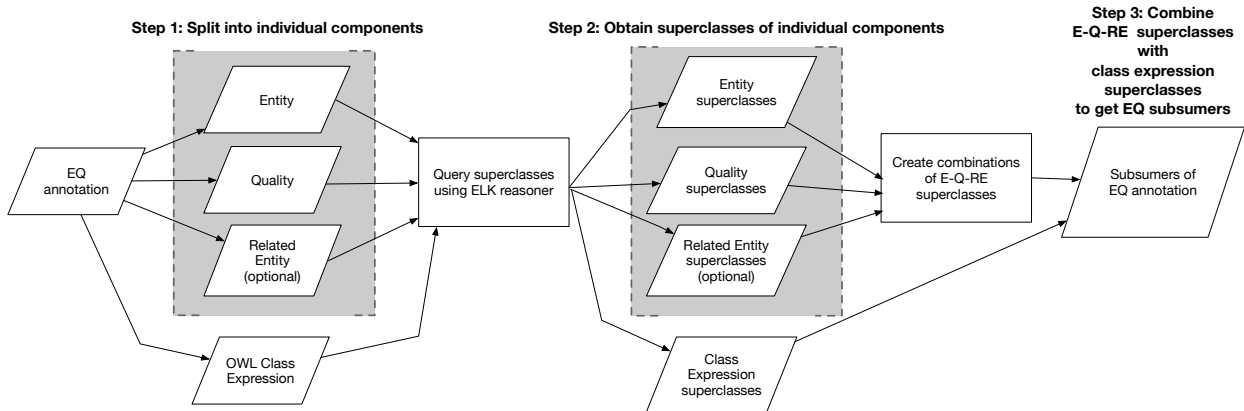

Figure 2: EQ annotations are split into Entity (E), Quality (Q), and Related Entity (RE) components, and also, transformed into an OWL class expression. Superclasses of E, Q, RE, and the class expression are queried via ELK. E, Q, RE superclasses are combined in the form E-Q-RE. These E-Q-RE superclasses along with the class expression’s superclasses form the subsumers of the EQ annotation for computation of semantic similarity.

465 Similarity of SCP annotations to the Gold Standard increased (26% average improve-  
 466 ment across the four metrics) after new ontology terms had been added by human curators  
 467 (detailed results are in Supplementary Materials, Table 2). The majority of statistics were  
 468 significantly affected between the use of the Augmented and final Merged ontologies in both  
 469 annotation rounds (Figure 4) with a few exceptions.  $PP$  and  $J_{\text{sim}}$  were not affected for C1

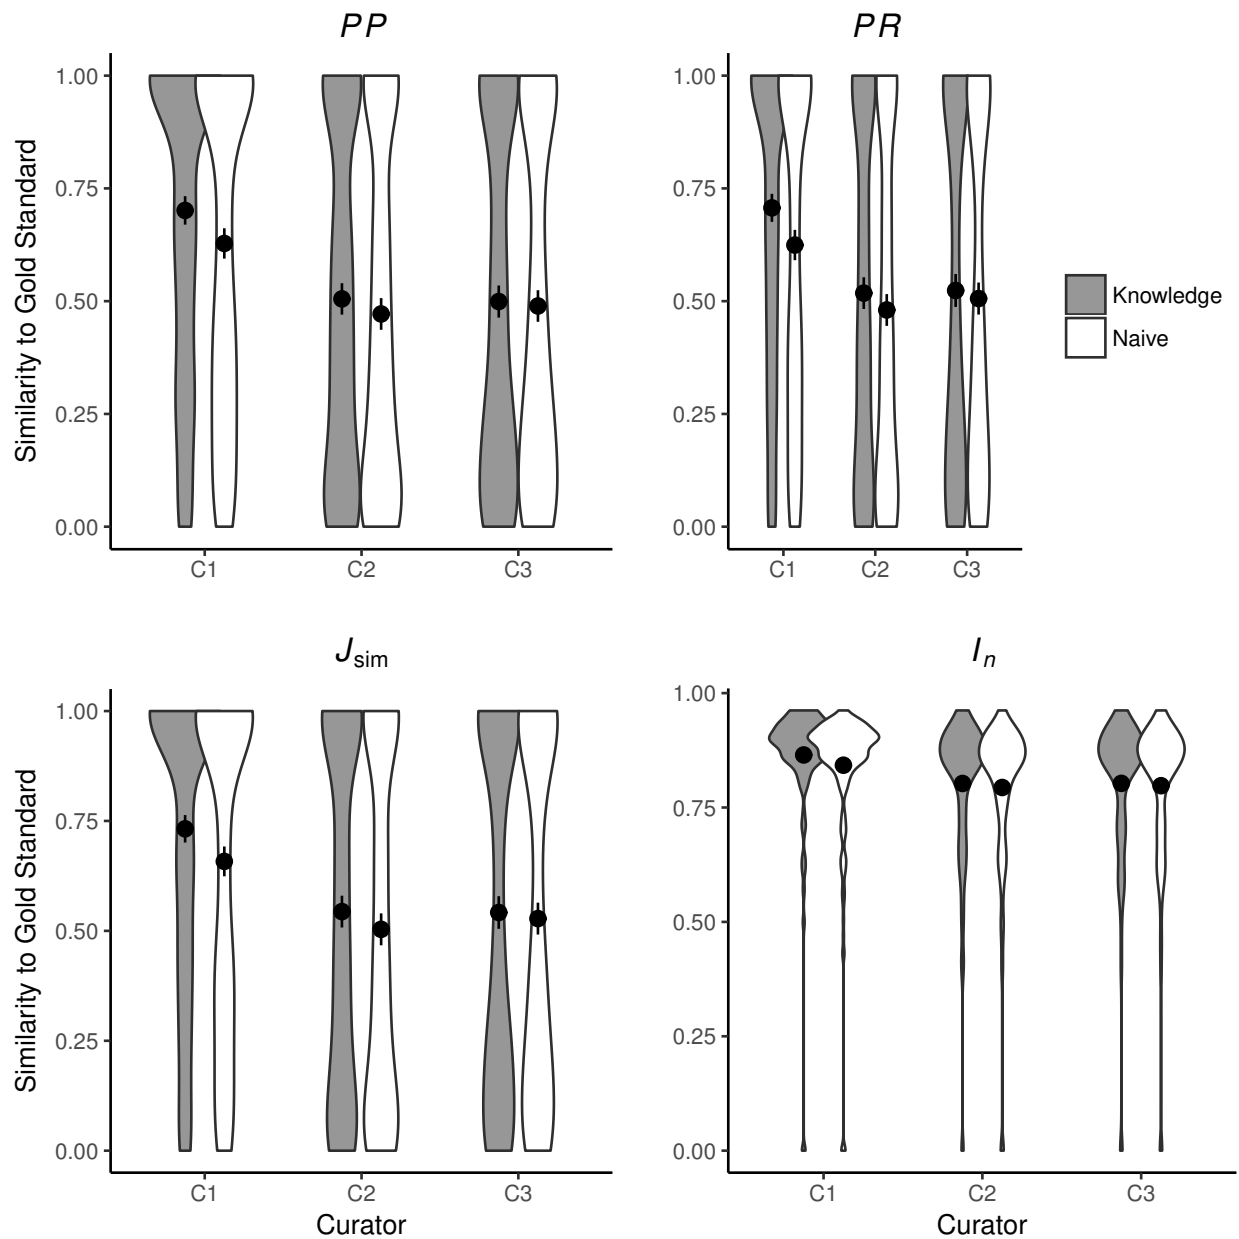

Figure 3: Similarity of human annotations to the Gold Standard in Naïve and Knowledge rounds. Shown are means across all 463 character states. Error bars represent two standard errors of the mean. Curators C1 (as per  $PP$ ,  $PR$ ,  $J_{sim}$ , and  $I_n$ ) and C2 (as per  $PR$ ,  $J_{sim}$ ) were significantly closer to the Gold Standard in the Knowledge round as compared to the Naïve round. Detailed results are shown in Supplementary Materials, Table 1

470 in the Knowledge round while  $PR$  was not affected in both rounds for C2. For C3,  $J_{sim}$ ,  
 471  $PP$  in the Knowledge round and  $PR$  in Naïve round were not significantly affected.  $p$ -values  
 472 for individual comparisons are shown in Supplementary Materials, Table 2.

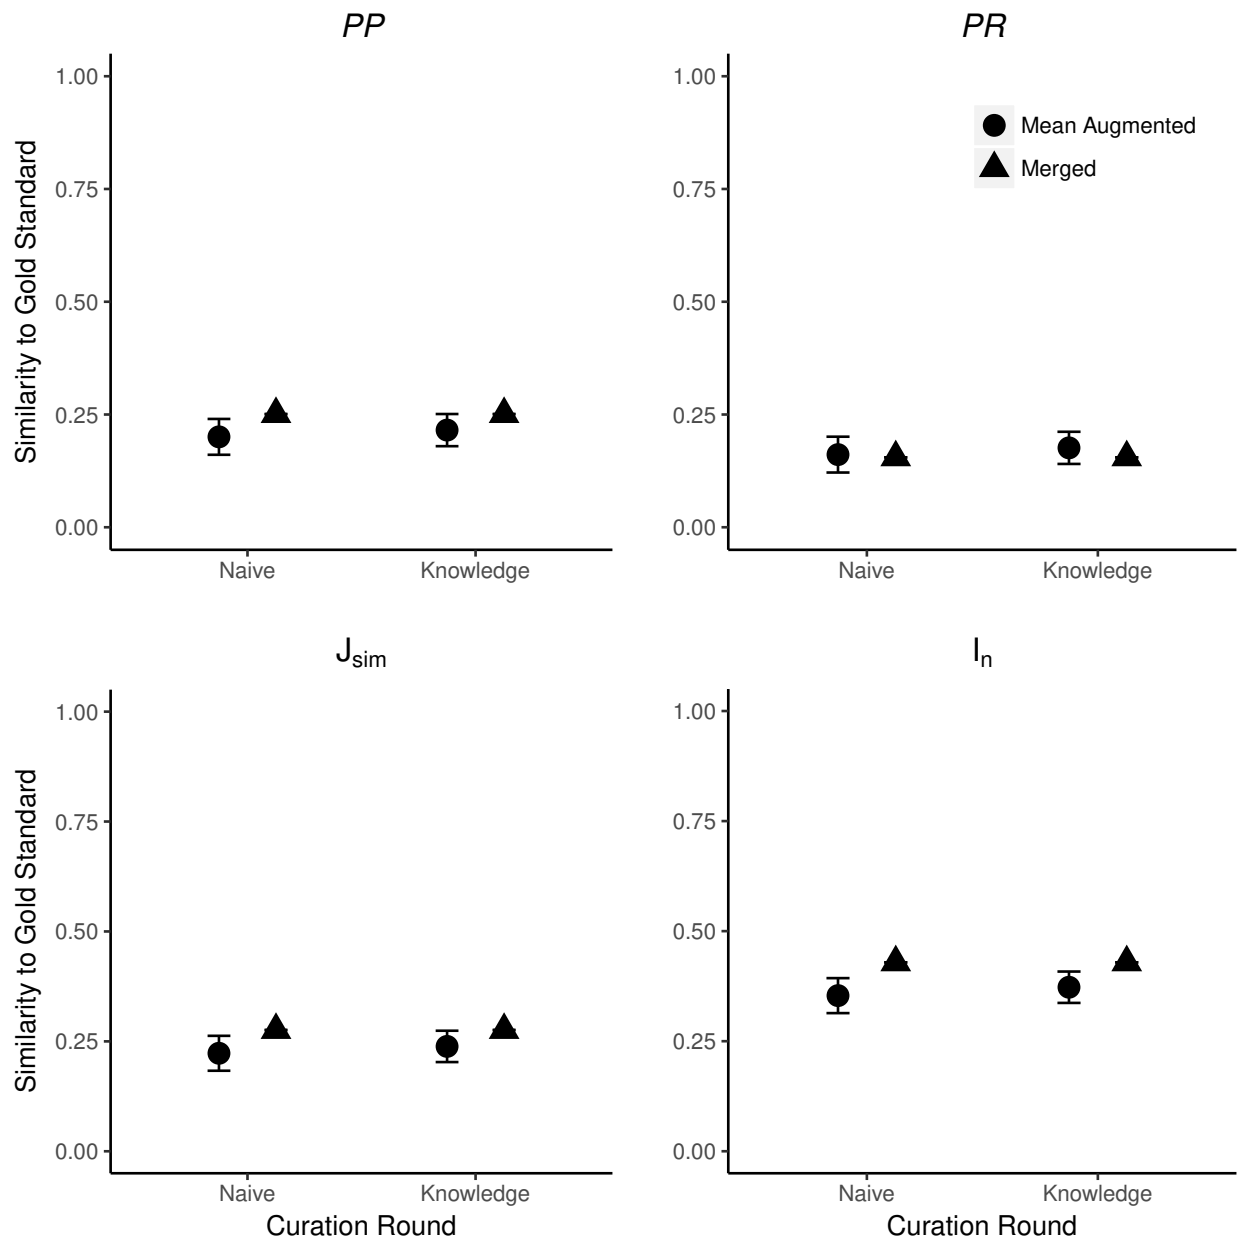

Figure 4: Effect of ontology completeness on SCP performance as measured by similarity to the Gold Standard. ‘Mean Augmented’ is the mean of similarity scores from the three curator augmented ontologies; error bars show two standard errors of the mean. Significant differences in similarity between SCP and the Gold Standard were found for the majority of statistics across the two rounds. Detailed results are shown in Supplementary Materials, Table 2

Table 4: Evaluation of annotations by original authors. Authors ranked the annotations from the Gold Standard, the three human curators (C1, C2 and C3) and Semantic Charaparser (SCP). A lower value corresponds to an annotation deemed to be more accurate or precise.

| Annotation    |           |
|---------------|-----------|
| source        | Mean rank |
| Gold Standard | 2.55      |
| C1            | 2.62      |
| C2            | 3.02      |
| C3            | 3.15      |
| SCP           | 3.67      |

### 4.3 Consistency among human curators

We computed consistency among curators for the EQ annotations generated for each character state. Figure 5 shows the mean inter-curator consistency scores across three pairwise comparisons in the Naïve and Knowledge rounds respectively for Partial Precision ( $PP$ ), Partial Recall ( $PR$ ),  $J_{\text{sim}}$ , and  $I_n$ . The differences between Naïve and Knowledge rounds are not statistically significant (two sided, paired Wilcoxon signed rank tests,  $n = 463$ ,  $p > 0.05$  for all comparisons). These results echo those reported by Cui et al. (11) for the same experiment but reflect statistics that account for ontology structure or annotation density.

To evaluate whether the absence of a difference in inter-curator consistency between the Naïve and Knowledge rounds was because curators made mostly the same annotations in both rounds, Cui et al. (11) examined the changes in EQ annotations. They found that curators created substantially different EQ annotations in the Knowledge round as compared to the Naïve round. Each curator changed EQ annotations between these rounds for more than 50% of character states. Among the EQs that were different between the two rounds, 29% were more complex, 33% were less complex, and 38% retained the same complexity in the Knowledge round.

Due to the lack of significant differences between inter-curator consistency in Naïve and Knowledge rounds (Figure 5), we only report curator results for the Knowledge round in subsequent sections.

### 4.4 Human-machine consistency

Using the same metrics as above, we compared the human-generated annotations to those generated by SCP. To evaluate the effect of the completeness of ontologies on SCP performance, we ran SCP separately with the Initial ontology, each of the three (C1, C2, or C3)

497 Augmented ontologies, and the Merged ontology. Approximately 15-20% of character state  
 498 annotations made by SCP using the different ontologies contained incomplete EQs. Incom-  
 499 plete EQs refer to those statements that are only partially matched to ontology terms, e.g.,  
 500 either E or Q terms are matched. In case of post-compositions, some parts needed in the  
 501 composition are not matched to an ontology term. Human-machine comparisons involving  
 502 character states with incomplete EQs were awarded a 0 similarity score.

503 We found that machine-human consistency was significantly lower than inter-curator con-  
 504 sistency by an average of 35% across the four metrics (detailed results are in Supplementary  
 505 Materials, Tables 3, 4). The overall averages for the four scores in the human-machine com-  
 506 parison (unfilled square markers in Figure 5) are substantially lower than the averages for the  
 507 comparisons among the human curators (circle markers in Figure 5). These comparisons are  
 508 statistically significant for all four metrics (two sided, paired Wilcoxon signed rank test:  $PP$ :  
 509  $p = 1.82 \times 10^{-13}$ ;  $PR$ :  $p = 3.36 \times 10^{-43}$ ;  $J_{\text{sim}}$ :  $p = 7.78 \times 10^{-18}$ ,  $I_n$ :  $p = 9.83 \times 10^{-32}$ ).

#### 510 4.4.1 Effect of ontology completeness on SCP-human consistency

511 Figure 5 shows the resulting  $PP$ ,  $PR$ ,  $J_{\text{sim}}$ , and  $I_n$  scores comparing SCP annotations  
 512 generated with the Initial, Merged, or Augmented ontologies (plus, unfilled square, and  
 513 filled square markers, respectively) to annotations from the human Knowledge round (as  
 514 noted above, no statistically significant differences were found in SCP similarity to human  
 515 annotations between the Naïve versus Knowledge rounds). However, almost universally, the  
 516 scores among the similarity metrics increased as the ontologies progressed from Initial to  
 517 Augmented and then from Augmented to Merged. The one exception is Partial Precision,  
 518 which declined from the Augmented to the Merged ontology. All these increases, and the  
 519 one decrease, were found to be statistically significant with two-sided paired Wilcoxon rank  
 520 sum tests at the Bonferonni-corrected threshold of  $\alpha = 0.0008$  (Table 5).

Table 5: Comparison of Semantic CharaParser annotations using Initial, Augmented, and Merged ontologies to measure the effect of ontology completeness on SCP-human consistency. Shown are  $p$ -values from two-sided paired Wilcoxon rank sum tests.

| Comparison                       | $PP$                   | $PR$                   | $J_{\text{sim}}$       | $I_n$                  |
|----------------------------------|------------------------|------------------------|------------------------|------------------------|
| Initial vs. Augmented ontologies | $9.45 \times 10^{-46}$ | $7.98 \times 10^{-39}$ | $1.67 \times 10^{-19}$ | $1.43 \times 10^{-14}$ |
| Augmented vs. Merged ontologies  | $1.71 \times 10^{-15}$ | $7.26 \times 10^{-23}$ | $3.02 \times 10^{-16}$ | $8.35 \times 10^{-16}$ |

#### 521 4.5 Author evaluation

522 We received responses to survey requests from six of the seven authors of the seven source  
 523 studies (Table 2). Of the six completed surveys, 3 authors evaluated (ranked) phenotypes

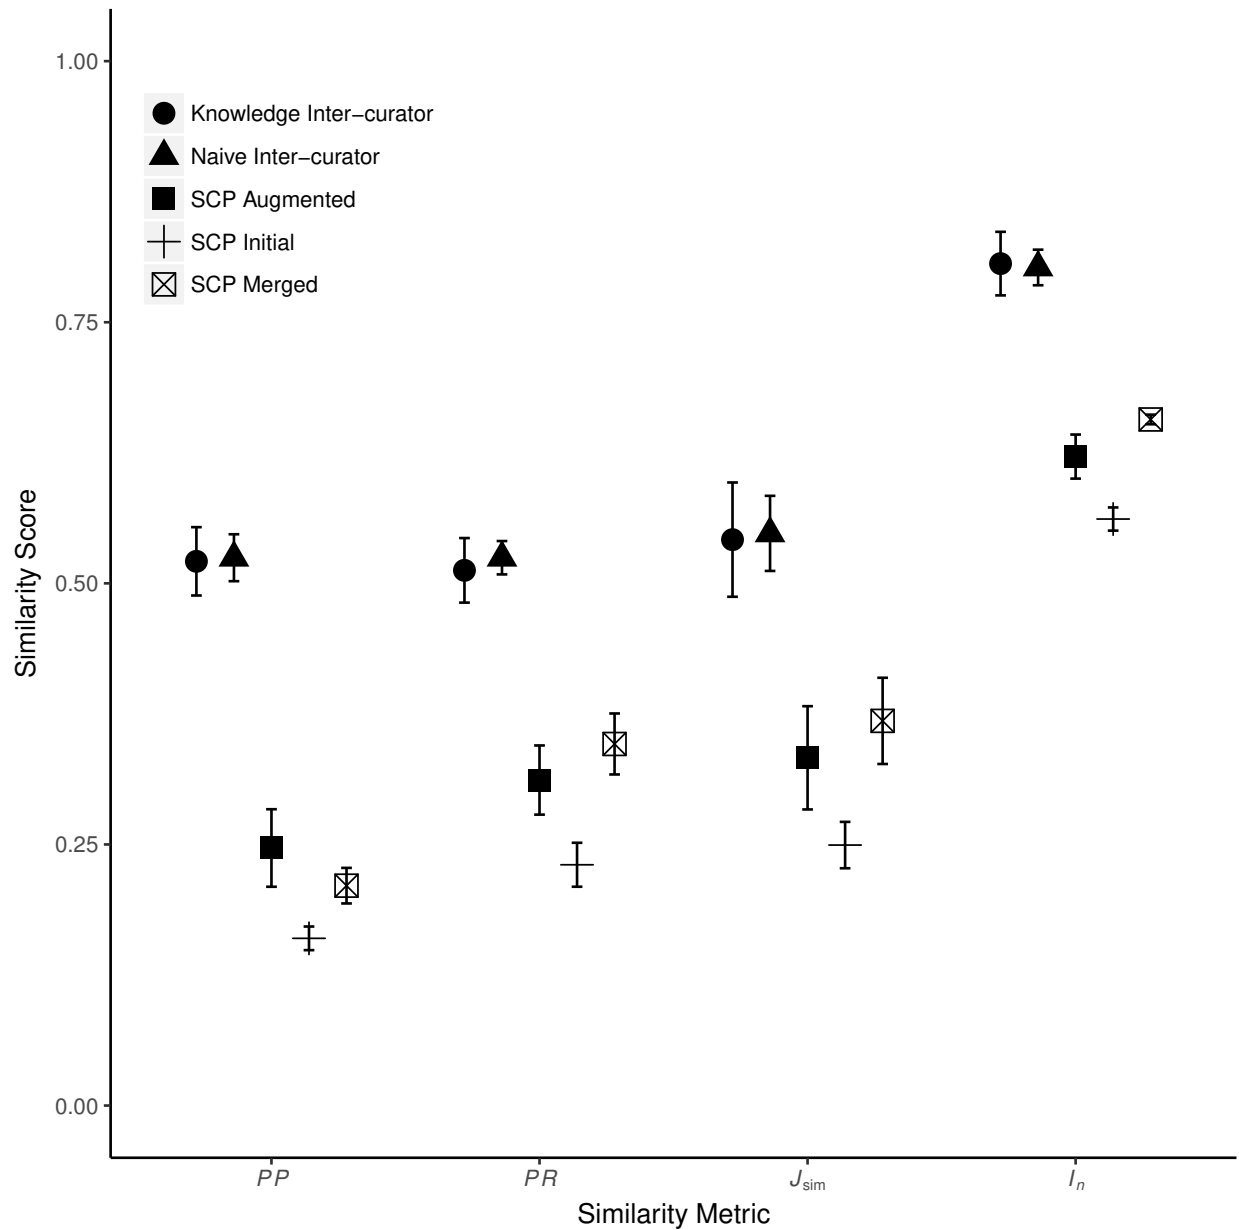

Figure 5: Mean inter-curator consistency and mean similarity between human and machine (SCP) generated annotations. Error bars show two standard errors of the mean. Inter-curator consistency results are shown for both the Naïve and Knowledge annotation rounds. SCP runs used either the Initial, C1, C2, or C3 Augmented, or the Merged ontologies. Only SCP similarity to human-generated annotations from the Knowledge round are shown. Consistency between SCP annotations to human annotations was significantly lower than human inter-curator consistency. Across all metrics, SCP annotation similarity to human annotations increased significantly between the use of Initial to Augmented ontologies and again from Augmented to the Merged ontology except for  $PP$  (decreased from Augmented to Merged). Detailed results are in Supplementary Materials, Tables 3, 4

524 for all 10 characters; 1 author ranked 9 characters; and 2 authors ranked 8 characters.  
525 Table 4 reports the mean rank assigned to each curation source. The overall distribution of  
526 ranks differed significantly among the curation sources (Friedman’s statistic,  $p = 0.00114$ )  
527 and there were significant differences among the mean ranks of each (Anderson’s statistic,  
528  $p = 0.00133$ ). The GS had the lowest mean rank among the annotation sources, and authors  
529 ranked the GS annotations first for 21 out of 55 characters, indicating that the GS came  
530 closest to the meaning of the original authors more frequently than others. SCP had the  
531 highest mean rank, indicating that the machine annotations were farthest away from the  
532 original authors’ intent more frequently than the individual human curators or the GS.

## 533 5 Discussion

### 534 5.1 Gold Standard

535 Phenotype curation is typically done manually, without significant assistance from machines.  
536 It is difficult and time-consuming, and across a wide variety of fields, from agriculture to  
537 medicine, it has been found not to scale to the size of the task at hand (51, 52). Develop-  
538 ing effective machine-based methods to aid in this task, however, requires standards against  
539 which to measure machine performance. The corpus of annotations developed here as a Gold  
540 Standard is the result of a methodical, multi-step process. Beginning with the choice of seven  
541 papers in the field of phylogenetic systematics that represent phenotypic diversity across ex-  
542 tinct and extant vertebrates, a set of 203 characters (463 states) were randomly selected.  
543 Three experienced curators with training and experience in EQ annotation and research  
544 backgrounds in vertebrate anatomy and phylogenetics independently annotated the charac-  
545 ters while simultaneously augmenting the initial ontologies. After merging their individual  
546 augmented ontologies, the three curators then discussed their annotations for each character  
547 state, and in some cases referenced external knowledge and contacted domain experts to  
548 clarify concepts, to develop consensus annotations. We then turned to the researchers who  
549 conceived of and described the original character states to assess the consensus annotations in  
550 relation to the machine-generated and individual curator annotations. Their judgment that  
551 the consensus annotations were on average closest in meaning to their original representation  
552 in free text validates use of the consensus annotations as a Gold Standard.

553 The Gold Standard presented here is the first of its type for evaluation of progress in  
554 machine learning of EQ phenotypes. It differs in a number of other ways from previously  
555 published Gold Standard corpora in the biomedical sciences. Rather than ensuring that  
556 every concept in the text of a character state is tagged with an ontology term (as is the case



557 for a concept-based Gold Standard, such as CRAFT (17)), we focused on generating EQ  
558 annotations that best represent the anatomical variation described in a character. Thus, in  
559 some cases, the EQ or EQs chosen for a particular character state may not include ontology  
560 terms in one-to-one correspondence with concepts described in the character. For example,  
561 the character state “parietal, entocarotid fossa, absent” was represented in a single EQ as  
562 E: ‘*entocarotid fossa*’, Q: ‘*absent*’. Parietal was not annotated because entocarotid fossa is  
563 the focus of the character, not the structure (parietal) that it is a part of. In addition, the  
564 domain knowledge that entocarotid fossa is part of the parietal is encoded in the Uberon  
565 anatomy ontology.

566 Similarly, in some cases, character states describing the presence of a structure are not  
567 annotated directly in the Gold Standard. This is because presence can be inferred using  
568 machine reasoning on annotations to different attributes (e.g., shape) of the structure (53).  
569 In the following character state, for example, “Hemipenis, horns: present, multi-cusped”  
570 (34), the annotation in the Gold Standard consists of a single EQ phenotype: E: ‘*horn*  
571 *of hemipenis*’, Q: ‘*multicuspidate*’. The presence of ‘*horn of hemipenis*’ is inferred by the  
572 assertion describing its shape and did not require a separate EQ annotation.

573 In other cases, “coarse” level annotations were used that did not include every concept in  
574 the character state due to limited expressivity in the EQ formalism. For example, take the  
575 character “Quadrangle, proximal portion, lateral condyle separated from the medial condyle by  
576 a deep but narrow furrow”. This relates three entities (lateral condyle of quadrangle, medial  
577 condyle of quadrangle, furrow), which cannot be expressed using the current EQ template  
578 model in Phenex: (31). Instead, this character state was annotated coarsely as: E: ‘*lateral*  
579 *condyle of quadrangle*’, Q: ‘*position*’, RE: ‘*medial condyle of quadrangle*’

580 More complex annotations can be made using a less restrictive annotation tool (e.g.,  
581 Protégé) rather than the EQ templates available in Phenex. However, allowing increased  
582 complexity when annotating in EQ format is likely to increase inter-curator variability. Pre-  
583 composed ontologies, i.e., phenotype ontologies, such as used by the HPO (54), could, how-  
584 ever, potentially decrease inter-curator variability because curators would be more likely to  
585 choose among existing terms rather than requesting a new one. Curators would also be aided  
586 by having access to existing, vetted annotations when creating new ones. Finally, provid-  
587 ing additional context for character descriptions, such as specimen illustrations or images,  
588 could greatly aid curators in capturing the original intent of a character. Although most  
589 publications do include illustrations or images for some characters, rarely is this done for all  
590 characters in a matrix.

591 Finally, in some cases the Gold Standard annotations did not fully represent the knowl-  
592 edge (explicit or implicit) of a character due to limitations in the expressivity of OWL. For

593 example, in the character: “height of the vertebral centrum relative to length of the neural  
594 spine”, size is implicitly compared between two structures in the same individual. How-  
595 ever, such within-individual comparison cannot be fully represented using an OWL class  
596 expression (55).

## 597 5.2 Inter-curator variation

598 The goal of evaluating the performance of automated curation tools is to engineer and im-  
599 prove machine-based curation to assist human curation as effectively as possible. Phenotype  
600 curation relies on deep domain and ontology knowledge as well as on expert judgement.  
601 Semantics in character descriptions can be variably interpreted, creating an inherent inter-  
602 curator variability. Thus, to judge the performance of automated curation tools against  
603 humans, it is important to first understand the level of variation between human curators  
604 as well as the sources of that variation.

605 As expected, we found considerable variation among human curators in our experiments.  
606 We observed that human curators achieved on average 54% of the maximum possible con-  
607 sistency as measured by  $J_{\text{sim}}$ , and 80% as measured by  $I_n$  (Figure 5). This variability  
608 in inter-curator similarity is within the range reported in previous studies (e.g., (56)), and  
609 likely reflects the complexity of annotation tasks requiring domain knowledge, the ability  
610 to navigate large ontologies, and experience and knowledge of annotation best practices.  
611 The inter-curator variability sets a ceiling for the maximum performance of a computational  
612 system if we assume that the human variability is primarily a consequence of the inher-  
613 ent ambiguity in how best to capture the semantics of the phenotype statement given the  
614 available ontologies.

615 Much of the observed inter-curator variation could be assigned to a few general types of  
616 sources:

- 617 • Curators choose different but related terms. For example, terms may be related through  
618 subsumption (e.g., ‘*circular*’ and ‘*subcircular*’ in PATO) or sibling relationships (e.g.,  
619 PATO:‘*unfused from*’ and ‘*separated from*’)
- 620 • Curators make differing decisions about how to post-compose entities. For example  
621 the entity for the character “*lateral pelvic glands, absent in males*“ was composed  
622 differently by the three curators as “*gland and (part\_of some (lateral region and part\_of  
623 some pelvis))*”, “*lateral pelvic gland and (part\_of some male organism)*”, and “*male  
624 organism and (has\_part some (pelvic glands and in\_lateral\_side\_of some multi-cellular  
625 organism))*”.

- 626 • Curators differ in how they composed an EQ even when choosing the same ontology  
627 terms. For example, two differently composed annotations for the character “*pelvic*  
628 *plate semicircular, present*” were E: *pelvic plate and (bearer\_of some semicircular)* +  
629 Q: *present* and E: *pelvic plate + Q: semicircular*.
- 630 • Curators differ in how they added needed terms to the ontologies. For example, in the  
631 phenotype “*dermal sculpture on skull-roof weak*“, one curator created a new term “*sur-*  
632 *face sculpting*” and post-composed the entity “*surface sculpting and (part\_of some der-*  
633 *matocranium)*” as the ontological translation of the entity because “*dermal sculpture*“  
634 did not exist in the Uberon anatomy ontology. Another curator used PATO: ‘*sculpted*  
635 *surface*’ to create a post-composed entity term “*dermatocranium and (bearer\_of some*  
636 *sculpted surface)*” to represent the same entity.

### 637 5.3 Human–machine variation

638 SCP achieved, on average, 37% and 66% consistency with human curators using the most  
639 comprehensive (merged) ontology, as measured by  $J_{\text{sim}}$  and  $I_n$ , respectively (Figure 5). This  
640 shows that the performance of SCP is significantly lower as compared to human inter-curator  
641 performance.

### 642 5.4 Usefulness of semantic similarity for partial matches

643 One of the major sources of annotation variation in either human or machine curators stems  
644 from choosing terms that are related to each other via subsumption or sibling relationships  
645 (see Section 5.2). Comparisons of curator annotations from this experiment show that, on  
646 average, only 26% of character-state comparisons are exact matches. Given that the majority  
647 of curator annotation pairs are partial matches, the use of semantic similarity metrics that  
648 can quantify different degrees of similarity proves to be important.

### 649 5.5 Effect of external knowledge on inter-curator consistency 650 and accuracy

651 One of the major differences between human and machine annotation is that humans can  
652 access external knowledge during curation, while machines cannot, beyond the encoded  
653 knowledge they have access to (here in the form of ontologies). Our measures of semantic  
654 similarity agreed with the results of Cui et al. (11) in showing that access to external knowl-  
655 edge had no effect on inter-curator consistency and did not further differentiate them from  
656 SCP’s annotations. Further, similarity to the Gold Standard was not generally increased.

657 This was true despite the fact that curators changed annotations considerably between the  
658 Naïve and Knowledge rounds. Interestingly, while we expected a general increase in com-  
659 plexity when curators were at liberty to bring in additional knowledge, this was not borne  
660 out by the data.

661 These results indicate that lack of access to external knowledge is not one of the fac-  
662 tors that contributes to SCP’s low performance with respect to human curators. This is  
663 encouraging, because lack of access to external knowledge during machine curation would  
664 be a challenge to remedy.

## 665 **5.6 Machine performance is improved as ontologies become** 666 **more complete**

667 Our results indicate that using more complete ontologies can significantly improve machine  
668 performance (Figures 4 and 5). This is encouraging because ontology completeness is con-  
669 tinually improved through the synergistic efforts of the ontology and curator communities.

670 This finding leads to specific ideas for how the curation workflow could be optimized by  
671 alternating execution of steps between human curators and algorithms. For instance, an  
672 initial round of machine curation would identify character states in the dataset for which  
673 good ontology matches were not found. Subsequently, human curators would judge whether  
674 the input ontology contains appropriate terms and focus on problem areas to add missing  
675 terms accordingly. Machines would then proceed with annotation using the human curator  
676 enhanced ontologies. Subsequently, human curators would review machine annotations and  
677 then either accept, modify, or re-curate them on a per-annotation basis. In such a workflow,  
678 machines would valuably augment the work of humans in the annotation process.

## 679 **5.7 Future Work**

### 680 **5.7.1 Improving reasoning over EQ annotations**

681 One of the major challenges with EQ annotations is efficiently calculating semantic similarity  
682 metrics. Specifically, for virtually all metrics, the first step is to identify common subsuming  
683 classes. Although in theory an OWL reasoner can perform this task, it can only identify  
684 named classes that already exist in the ontology. A brute-force approach in which a composite  
685 ontology is computed as the cross-product of  $E \times Q \times RE$  terms (for entity, quality, related  
686 entity; or even only  $E \times Q$ ) (57) would result in a background ontology too large even  
687 for efficient reasoners such as ELK, and the vast majority of its compound classes would  
688 not be needed as subsumers. Further work is needed to improve this method for efficiency

689 (computational time and memory) of the semantic similarity scoring.

### 690 5.7.2 Improving Semantic CharaParser

691 Cui et al. (11) identified a number of areas of potential improvement for SCP, and the  
692 present study further refines our understanding of where the machine curation is encountering  
693 obstacles. The observed shortcomings primarily fall in the areas of entity post-composition,  
694 the handling of relational qualities in annotations, and ontology searching in PATO. One  
695 way to improve the latter would be to enable the ontology search to locate multiple-word  
696 PATO qualities such as ‘*posteriorly directed*’, which in turn would allow more meaningful  
697 post-composed terms to be generated. And mentioned in Section 5.6, our results show that  
698 more comprehensive input ontologies will lead to improved performance of SCP.

## 699 Conclusions

700 The Gold Standard dataset for EQ phenotype curation developed herein is a high-quality  
701 resource that will be of value to the sizable community of biocurators annotating phenotypes  
702 using the EQ formalism. As illustrated here, the Gold Standard enables assessment of how  
703 well a machine can performs EQ annotation and the impact of using different ontologies for  
704 that task. At present, machine-generated annotations are less similar to the Gold Standard  
705 than those of an expert human curator. The continued use of this corpus as a Gold Standard  
706 will enable training and evaluation of machine curation software in order to ultimately make  
707 phenotype annotation accurate at scale.

## 708 References

- 709 1. Smith, B., Ashburner, M., Rosse, C., Bard, J., Bug, W., Ceusters, W., Goldberg, L.J.,  
710 Eilbeck, K., Ireland, A., Mungall, C.J. *et al.* (2007) The OBO Foundry: coordinated  
711 evolution of ontologies to support biomedical data integration. *Nature Biotechnology*,  
712 **25**, 11, 1251–1255.
- 713 2. Howe, D.G., Frazer, K., Fashena, D., Ruzicka, L., Bradford, Y., Ramachandran, S., Ruef,  
714 B.J., Van Slyke, C., Singer, A. and Westerfield, M. (2011) Data Extraction, Transforma-  
715 tion, and Dissemination through ZFIN. *Zebrafish: Genetics, Genomics and Informatics*,  
716 *3rd ed.*, **104**, 313–325.
- 717 3. Bradford, Y., Conlin, T., Dunn, N., Fashena, D., Frazer, K., Howe, D.G., Knight, J.,

- 718 Mani, P., Martin, R., Moxon, S.A. *et al.* (2011) ZFIN: enhancements and updates to the  
719 Zebrafish Model Organism Database. *Nucleic Acids Research*, **39**, suppl 1, D822–D829.
- 720 4. Bowes, J.B., Snyder, K.A., Segerdell, E., Gibb, R., Jarabek, C., Noumen, E., Pollet,  
721 N. and Vize, P.D. (2008) Xenbase: a *Xenopus* biology and genomics resource. *Nucleic*  
722 *Acids Research*, **36**, suppl 1, D761–D767.
- 723 5. Blake, J.A., Bult, C.J., Eppig, J.T., Kadin, J.A., Richardson, J.E. *et al.* (2009) The  
724 mouse genome database genotypes:: phenotypes. *Nucleic Acids Research*, **37**, suppl 1,  
725 D712–D719.
- 726 6. Mungall, C., Gkoutos, G., Washington, N. and Lewis, S. (2007) Representing Phenotypes  
727 in OWL. In *Proceedings of the OWLED 2007 Workshop on OWL: Experience and*  
728 *Directions*.
- 729 7. Mungall, C.J., Gkoutos, G.V., Smith, C.L., Haendel, M.A., Lewis, S.E. and Ashburner,  
730 M. (2010) Integrating phenotype ontologies across multiple species. *Genome Biology*,  
731 **11**, 1, R2.
- 732 8. Deans, A.R., Lewis, S.E., Huala, E., Anzaldo, S.S., Ashburner, M., Balhoff, J.P., Black-  
733 burn, D.C., Blake, J.A., Burleigh, J.G., Chanet, B. *et al.* (2015) Finding our way through  
734 phenotypes. *PLoS Biology*, **13**, 1, e1002033.
- 735 9. Loebe, F., Stumpf, F., Hoehndorf, R. and Herre, H. (2012) Towards improving phenotype  
736 representation in OWL. *Journal of Biomedical Semantics*, **3**, 2, 1–17.
- 737 10. Balhoff, J.P., Dahdul, W.M., Dececchi, T.A., Lapp, H., Mabee, P.M. and Vision, T.J.  
738 (2014) Annotation of phenotypic diversity: decoupling data curation and ontology cu-  
739 ration using Phenex. *Journal of Biomedical Semantics*, **5**, 1, 45.
- 740 11. Cui, H., Dahdul, W., Dececchi, A., Ibrahim, N., Mabee, P., Balhoff, J. and Gopalakrish-  
741 nan, H. (2015) Charaparser+EQ: Performance evaluation without gold standard. *Pro-*  
742 *ceedings of the Association for Information Science and Technology*, **52**, 1, 1–10.
- 743 12. Mabee, P.M., Ashburner, M., Cronk, Q., Gkoutos, G.V., Haendel, M., Segerdell, E.,  
744 Mungall, C. and Westerfield, M. (2007) Phenotype ontologies: the bridge between ge-  
745 nomics and evolution. *Trends in Ecology & Evolution*, **22**, 7, 345–350.
- 746 13. Campos, D., Matos, S., Lewin, I., Oliveira, J.L. and Rebholz-Schuhmann, D. (2012)  
747 Harmonization of gene/protein annotations: towards a gold standard MEDLINE. *Bioin-*  
748 *formatics*, **28**, 9, 1253–1261.

- 749 14. Groza, T., Oellrich, A. and Collier, N. (2013) Using silver and semi-gold standard corpora  
750 to compare open named entity recognisers. In *Bioinformatics and Biomedicine (BIBM),*  
751 *2013 IEEE International Conference on.* IEEE, pp. 481–485.
- 752 15. Funk, C., Baumgartner, W., Garcia, B., Roeder, C., Bada, M., Cohen, K.B., Hunter,  
753 L.E. and Verspoor, K. (2014) Large-scale biomedical concept recognition: an evaluation  
754 of current automatic annotators and their parameters. *BMC Bioinformatics*, **15**, 1, 59.  
755 doi:10.1186/1471-2105-15-59.
- 756 16. Mabee, P., Balhoff, J.P., Dahdul, W.M., Lapp, H., Midford, P.E., Vision, T.J. and  
757 Westerfield, M. (2012) 500,000 fish phenotypes: The new informatics landscape for evo-  
758 lutionary and developmental biology of the vertebrate skeleton. *Journal of Applied*  
759 *Ichthyology*, **28**, 3, 300–305.
- 760 17. Bada, M., Eckert, M., Evans, D., Garcia, K., Shipley, K., Sitnikov, D., Baumgartner,  
761 W.A., Cohen, K.B., Verspoor, K., Blake, J.A. *et al.* (2012) Concept annotation in the  
762 CRAFT corpus. *BMC Bioinformatics*, **13**, 1, 161.
- 763 18. Pesquita, C., Faria, D., Falcao, A.O., Lord, P. and Couto, F.M. (2009) Semantic simi-  
764 larity in biomedical ontologies. *PLoS Computational Biology*, **5**, 7, e1000443.
- 765 19. Bada, M., Vasilevsky, N., Haendel, M. and Hunter, L. (2016) Gold-standard ontology-  
766 based annotation of concepts in biomedical text in the CRAFT corpus: Updates and  
767 extensions. In *ICBO/BioCreative, CEUR Workshop Proceedings*. vol. 1747.
- 768 20. Kim, J.D., Ohta, T., Tateisi, Y. and Tsujii, J. (2003) GENIA corpus—a semantically  
769 annotated corpus for bio-textmining. *Bioinformatics*, **19**, suppl.1, i180–i182.
- 770 21. Lu, Z., Kao, H.Y., Wei, C.H., Huang, M., Liu, J., Kuo, C.J., Hsu, C.N., Tsai, R.T.H.,  
771 Dai, H.J., Okazaki, N., Cho, H.C., Gerner, M., Solt, I., Agarwal, S., Liu, F., Vishnyakova,  
772 D., Ruch, P., Romacker, M., Rinaldi, F., Bhattacharya, S., Srinivasan, P., Liu, H., Torii,  
773 M., Matos, S., Campos, D., Verspoor, K., Livingston, K.M. and Wilbur, W.J. (2011)  
774 The gene normalization task in BioCreative III. *BMC Bioinformatics*, **12**, 8, S2.
- 775 22. Kors, J.A., Clematide, S., Akhondi, S.A., van Mulligen, E.M. and Rebholz-Schuhmann,  
776 D. (2015) A multilingual gold-standard corpus for biomedical concept recognition: the  
777 Mantra GSC. *Journal of the American Medical Informatics Association*, **22**, 5, 948–956.
- 778 23. Oellrich, A., Collier, N., Smedley, D. and Groza, T. (2015) Generation of silver standard  
779 concept annotations from biomedical texts with special relevance to phenotypes. *PLoS*  
780 *ONE*, **10**, 1, 1–17.

- 781 24. Rebholz-Schuhmann, D., Yepes, A.J.J., Van Mulligen, E.M., Kang, N., Kors, J., Mil-  
782 ward, D., Corbett, P., Buyko, E., Beisswanger, E. and Hahn, U. (2010) CALBC silver  
783 standard corpus. *Journal of Bioinformatics and Computational Biology*, **8**, 01, 163–179.
- 784 25. Wieggers, T.C., Davis, A.P., Cohen, K.B., Hirschman, L. and Mattingly, C.J. (2009)  
785 Text mining and manual curation of chemical-gene-disease networks for the comparative  
786 toxicogenomics database (CTD). *BMC Bioinformatics*, **10**, 1, 326.
- 787 26. Söhngen, C., Chang, A. and Schomburg, D. (2011) Development of a classification  
788 scheme for disease-related enzyme information. *BMC Bioinformatics*, **12**, 1, 329.
- 789 27. Camon, E.B., Barrell, D.G., Dimmer, E.C., Lee, V., Magrane, M., Maslen, J., Binns, D.  
790 and Apweiler, R. (2005) An evaluation of GO annotation retrieval for BioCreAtIvE and  
791 GOA. *BMC Bioinformatics*, **6**, Suppl 1, S17.
- 792 28. Coates, M.I. and Sequeira, S.E. (2001) Early Sharks and Primitive Gnathostome Inter-  
793 relationships. In P.E. Ahlberg, (ed.) *Major Events in Early Vertebrate Evolution*, Taylor  
794 & Francis, London, pp. 241–262.
- 795 29. Hill, R.V. (2005) Integration of morphological data sets for phylogenetic analysis of Am-  
796 niota: the importance of integumentary characters and increased taxonomic sampling.  
797 *Systematic Biology*, **54**, 4, 530–547.
- 798 30. Skutschas, P.P. and Gubin, Y.M. (2012) A new salamander from the late Paleocene-early  
799 Eocene of Ukraine. *Acta Palaeontologica Polonica*, **57**, 1, 135–148.
- 800 31. Nesbitt, S.J., Ksepka, D.T. and Clarke, J.A. (2011) Podargiform affinities of the  
801 enigmatic Fluvioviridavis platyrhamphus and the early diversification of Strisores  
802 (“Caprimulgiformes” + Apodiformes). *PLoS ONE*, **6**, 11, e26350.
- 803 32. Chakrabarty, P. (2007) A Morphological Phylogenetic Analysis of Middle American Ci-  
804 chlids with Special Emphasis on the Section Nandopsis Sensu Regan. *Museum of Zoology,*  
805 *University of Michigan*, , 198, 1–30.
- 806 33. O’Leary, M.A., Bloch, J.I., Flynn, J.J., Gaudin, T.J., Giallombardo, A., Giannini, N.P.,  
807 Goldberg, S.L., Kraatz, B.P., Luo, Z.X., Meng, J. *et al.* (2013) The placental mammal  
808 ancestor and the post-K-Pg radiation of placentals. *Science*, **339**, 6120, 662–667.
- 809 34. Conrad, J.L. (2008) Phylogeny and systematics of Squamata (Reptilia) based on mor-  
810 phology. *Bulletin of the American Museum of Natural History*, , 310, 1–182.



- 811 35. Balhoff, J.P., Dahdul, W.M., Kothari, C.R., Lapp, H., Lundberg, J.G., Mabee, P.,  
812 Midford, P.E., Westerfield, M. and Vision, T.J. (2010) Phenex: ontological annotation  
813 of phenotypic diversity. *PLoS ONE*, **5**, 5, e10500.
- 814 36. Mungall, C.J., Torniai, C., Gkoutos, G.V., Lewis, S.E. and Haendel, M.A. (2012) Uberon,  
815 an integrative multi-species anatomy ontology. *Genome Biology*, **13**, 1, R5.
- 816 37. Haendel, M.A., Balhoff, J.P., Bastian, F.B., Blackburn, D.C., Blake, J.A., Bradford, Y.,  
817 Comte, A., Dahdul, W.M., Dececchi, T.A., Druzinsky, R.E. *et al.* (2014) Unification of  
818 multi-species vertebrate anatomy ontologies for comparative biology in Uberon. *Journal*  
819 *of Biomedical Semantics*, **5**, 1, 21.
- 820 38. Gkoutos, G., Green, E., Mallon, A.M., Blake, A., Greenaway, S., Hancock, J. and David-  
821 son, D. (2004) Ontologies for the description of mouse phenotypes. *Comparative and*  
822 *Functional Genomics*, **5**, 6-7, 545–551.
- 823 39. Gkoutos, G.V., Green, E.C., Mallon, A.M., Hancock, J.M. and Davidson, D. (2004)  
824 Using ontologies to describe mouse phenotypes. *Genome Biology*, **6**, 1, R8.
- 825 40. Dahdul, W.M., Cui, H., Mabee, P.M., Mungall, C.J., Osumi-Sutherland, D., Walls, R.L.  
826 and Haendel, M.A. (2014) Nose to tail, roots to shoots: spatial descriptors for phenotypic  
827 diversity in the Biological Spatial Ontology. *Journal of Biomedical Semantics*, **5**, 1, 34.
- 828 41. Dahdul, W.M., Balhoff, J.P., Engeman, J., Grande, T., Hilton, E.J., Kothari, C., Lapp,  
829 H., Lundberg, J.G., Midford, P.E., Vision, T.J. *et al.* (2010) Evolutionary characters,  
830 phenotypes and ontologies: curating data from the systematic biology literature. *PLoS*  
831 *One*, **5**, 5, e10708.
- 832 42. Dahdul, W., Balhoff, J., Dececchi, A., Ibrahim, N. and Mabee, P. (2014). Phenoscape  
833 Guide to Character Annotation. doi:10.6084/m9.figshare.1210738.
- 834 43. Whetzel, P.L., Noy, N.F., Shah, N.H., Alexander, P.R., Nyulas, C., Tudorache, T. and  
835 Musen, M.A. (2011) BioPortal: enhanced functionality via new Web services from the  
836 National Center for Biomedical Ontology to access and use ontologies in software appli-  
837 cations. *Nucleic Acids Research*, **39**, W541–5.
- 838 44. Mistry, M. and Pavlidis, P. (2008) Gene Ontology term overlap as a measure of gene  
839 functional similarity. *BMC Bioinformatics*, **9**, 1, 327.
- 840 45. Resnik, P. (1999) Semantic similarity in a taxonomy: An information-based measure  
841 and its application to problems of ambiguity in natural language. *Journal of Artificial*  
842 *Intelligence Research*, **11**, 95–130.

- 843 46. Euzenat, J. (2007) Semantic precision and recall for ontology alignment evaluation. In  
844 *Proceedings of the 20th International Joint Conference on Artificial intelligence (IJ-*  
845 *CAI'07)*. pp. 348–353.
- 846 47. Bada, M., Baumgartner Jr, W.A., Funk, C., Hunter, L.E. and Verspoor, K. (2014)  
847 Semantic precision and recall for concept annotation of text. In *Proceedings of Bio-*  
848 *Ontologies*. pp. 30–37.
- 849 48. Brockhoff, P.B., Best, D.J. and Rayner, J.C.W. (2003) Using Anderson’s Statistic to  
850 compare distributions of consumer preference rankings. *Journal of Sensory Studies*, **18**,  
851 77–82.
- 852 49. Vos, R.A., Balhoff, J.P., Caravas, J.A., Holder, M.T., Lapp, H., Maddison, W.P., Mid-  
853 ford, P.E., Priyam, A., Sukumaran, J., Xia, X. and Stoltzfus, A. (2012) NeXML: rich,  
854 extensible, and verifiable representation of comparative data and metadata. *Systematic*  
855 *Biology*, **61**, 4, 675–689.
- 856 50. Balhoff, J. (2017). [https://github.com/phenoscape/Phenex/blob/master/src/  
857 main/java/org/phenoscape/main/SelectCharactersForExercise.java](https://github.com/phenoscape/Phenex/blob/master/src/main/java/org/phenoscape/main/SelectCharactersForExercise.java).
- 858 51. Dahdul, W., Dececchi, T.A., Ibrahim, N., Lapp, H. and Mabee, P. (2015) Moving the  
859 mountain: analysis of the effort required to transform comparative anatomy into com-  
860 putable anatomy. *Database*, **2015**, bav040.
- 861 52. International Society for Biocuration (2018) Biocuration: Distilling data into knowledge.  
862 *PLOS Biology*, **16**, 4, e2002846.
- 863 53. Dececchi, T.A., Balhoff, J.P., Lapp, H. and Mabee, P.M. (2015) Toward Synthesizing  
864 Our Knowledge of Morphology: Using Ontologies and Machine Reasoning to Extract  
865 Presence/Absence Evolutionary Phenotypes across Studies. *Systematic Biology*, **64**, 6,  
866 936–952.
- 867 54. Köhler, S., Vasilevsky, N.A., Engelstad, M., Foster, E., McMurry, J., Aymé, S., Baynam,  
868 G., Bello, S.M., Boerkoel, C.F., Boycott, K.M. *et al.* (2017) The human phenotype  
869 ontology in 2017. *Nucleic Acids Research*, **45**, D1, D865–D876.
- 870 55. Motik, B., Grau, B.C., Horrocks, I. and Sattler, U. (2009) Representing ontologies using  
871 description logics, description graphs, and rules. *Artificial Intelligence*, **173**, 14, 1275 –  
872 1309.

- 873 56. Arighi, C.N., Carterette, B., Cohen, K.B., Krallinger, M., Wilbur, W.J., Fey, P., Dodson,  
874 R., Cooper, L., Van Slyke, C.E., Dahdul, W. *et al.* (2013) An overview of the BioCreative  
875 2012 Workshop Track III: interactive text mining task. *Database*, **2013**, bas056.
- 876 57. Washington, N.L., Haendel, M.A., Mungall, C.J., Ashburner, M., Westerfield, M. and  
877 Lewis, S.E. (2009) Linking human diseases to animal models using ontology-based phe-  
878 notype annotation. *PLoS Biology*, **7**, 11, e1000247.

## 879 Acknowledgments

880 This work was supported by the National Science Foundation (DBI-1062542, EF-0849982,  
881 and DBI-1147266). We thank M. Haendel and C. Mungall for suggestions on experiment  
882 design and ontology usage. We thank P. Chakrabarty, J. Clark, M. Coates, R. Hill, P.  
883 Skutschas, and J. Wible for completing the author assessments. P. Fernando and L. Jack-  
884 son provided valuable feedback on the Gold Standard and Phenoscape Guide to Character  
885 Annotation. We thank D. Blackburn for his helpful comments on this manuscript. This  
886 manuscript is based on work done by P. Mabee while serving at the U.S. National Science  
887 Foundation. The views expressed in this paper do not necessarily reflect those of the National  
888 Science Foundation or the United States Government.
